# Supplementary material
Source: Springer Nature journal article supplement (https://www.springermedizin.de/resource/supplementary/12936_2011_1683_MOESM1_ESM.pdf/9542398)

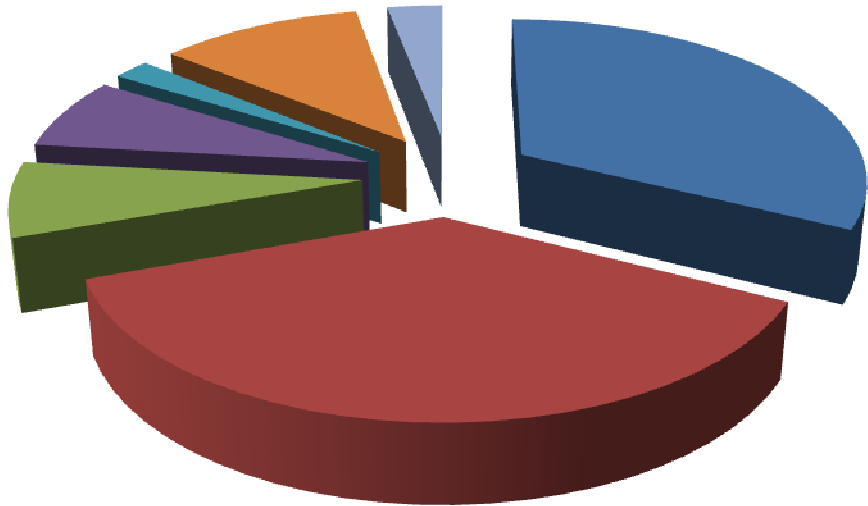

- ACT
- SP
- Chloroquine
- Quinine
- AQ
- Antipyretic
- Cough syrup

Supplement: MOESM1 [file 9542398]
